# Supplementary material for: Seroepidemiological Analysis of Canine Leptospira Species Infections in Changchun, China
Source: MDPI journal article supplement (doi:10.3390/pathogens12070930), 2023-07-12
Supplement: s1 [file s1]

**Supplementary Table S1. Leptospira strain used in MAT.**

| <b>Serogroup</b>    | <b>Strain</b> |
|---------------------|---------------|
| Icterohaemorrhagiae | 56601         |
| Javanica            | 56602         |
| Canicola            | 56603         |
| Ballum              | 56604         |
| Pyrogenes           | 56605         |
| Autumnalis          | 56606         |
| Australis           | 56607         |
| Pomona              | 56608         |
| Grippotyphosa       | 56609         |
| Hebdomadis          | 56610         |
| Bataviae            | 56612         |
| Tarassovi           | 56613         |
| Manhao              | 56615         |
| Sejroe              | 56635         |
| Mini                | 56655         |
